# Supplementary material
Source: PubMed Central journal article supplement (PMC4442669)
Supplement: jp5b02348_si_001.pdf [file jp5b02348_si_001.pdf]

# Enhanced Ligand Sampling for Relative Protein-Ligand Binding Free Energy Calculations

Joseph W. Kaus<sup>†</sup> and J. Andrew McCammon<sup>\*,†,‡,¶,§</sup>

*Department of Chemistry and Biochemistry, Center for Theoretical Biological Physics,  
Department of Pharmacology, and Howard Hughes Medical Institute, University of California  
San Diego, La Jolla, California 92093-0365*

E-mail: [jmccammon@ucsd.edu](mailto:jmccammon@ucsd.edu)

---

\*To whom correspondence should be addressed

<sup>†</sup>Department of Chemistry and Biochemistry

<sup>‡</sup>Center for Theoretical Biological Physics

<sup>¶</sup>Department of Pharmacology

<sup>§</sup>Howard Hughes Medical Institute





**Table S 1: GAFF Atom types and partial charges for CDA (see Figure S1a).**

| Atom Name | Atom Type | Partial Charge | Atom Name | Atom Type | Partial Charge |
|-----------|-----------|----------------|-----------|-----------|----------------|
| C20       | ca        | 0.096703       | C12       | c3        | -0.4586        |
| N6        | nb        | -0.377379      | H9        | hc        | 0.152835       |
| H19       | h4        | 0.124529       | H10       | hc        | 0.152835       |
| C19       | ca        | -0.287306      | H11       | hc        | 0.152835       |
| H18       | ha        | 0.179329       | C9        | c         | 0.356933       |
| C18       | ca        | -0.099078      | O1        | o         | -0.572387      |
| H17       | ha        | 0.177581       | C8        | cc        | 0.533186       |
| C17       | ca        | 0.116652       | N2        | nh        | -0.659232      |
| F3        | f         | -0.197162      | H7        | hn        | 0.353717       |
| C16       | ca        | 0.348115       | C7        | c3        | 0.12318        |
| C15       | c3        | -0.097875      | H5        | h1        | 0.052032       |
| H15       | h1        | 0.102647       | H6        | h1        | 0.052032       |
| H16       | h1        | 0.102647       | C6        | c3        | 0.308871       |
| N5        | n         | -0.431195      | F1        | f         | -0.228623      |
| H14       | hn        | 0.219453       | F2        | f         | -0.228623      |
| C14       | c         | 0.731423       | C1        | ca        | 0.49594        |
| O2        | o         | -0.615796      | N1        | nb        | -0.541785      |
| C13       | c3        | -0.250141      | C5        | ca        | 0.298925       |
| H12       | h1        | 0.12114        | H4        | h4        | 0.078074       |
| H13       | h1        | 0.12114        | C4        | ca        | -0.384422      |
| N3        | n         | 0.056757       | H3        | ha        | 0.176746       |
| C10       | cc        | 0.052845       | C3        | ca        | 0.102239       |
| C11       | cd        | -0.17781       | H2        | ha        | 0.12547        |
| N4        | nd        | -0.407801      | C2        | ca        | -0.434052      |
| H8        | h4        | 0.185363       | H1        | ha        | 0.197092       |

**Table S 2: GAFF Atom types and partial charges for CDB (see Figure S1b).**

| Atom Name | Atom Type | Partial Charge | Atom Name | Atom Type | Partial Charge |
|-----------|-----------|----------------|-----------|-----------|----------------|
| C20       | ca        | 0.319031       | H8        | h4        | 0.186333       |
| N6        | nb        | -0.625632      | C12       | c3        | -0.464758      |
| H18       | h4        | 0.090746       | H9        | hc        | 0.155338       |
| C19       | ca        | -0.559542      | H10       | hc        | 0.155338       |
| H17       | ha        | 0.219323       | H11       | hc        | 0.155338       |
| C18       | ca        | 0.415675       | C9        | c         | 0.317715       |
| C21       | c3        | -0.460437      | O1        | o         | -0.568285      |
| H19       | hc        | 0.143587       | C8        | cc        | 0.515622       |
| H20       | hc        | 0.143587       | N2        | nh        | -0.619241      |
| H21       | hc        | 0.143587       | H7        | hn        | 0.334388       |
| C17       | ca        | -0.128979      | C7        | c3        | 0.113064       |
| F3        | f         | -0.136524      | H5        | h1        | 0.053337       |
| C16       | ca        | 0.464366       | H6        | h1        | 0.053337       |
| C15       | c3        | 0.029658       | C6        | c3        | 0.299592       |
| H15       | h1        | 0.068821       | F1        | f         | -0.228867      |
| H16       | h1        | 0.068821       | F2        | f         | -0.228867      |
| N5        | n         | -0.56162       | C1        | ca        | 0.52           |
| H14       | hn        | 0.317318       | N1        | nb        | -0.556409      |
| C14       | c         | 0.74971        | C5        | ca        | 0.307317       |
| O2        | o         | -0.5963        | H4        | h4        | 0.076862       |
| C13       | c3        | -0.23602       | C4        | ca        | -0.388736      |
| H12       | h1        | 0.105076       | H3        | ha        | 0.176994       |
| H13       | h1        | 0.105076       | C3        | ca        | 0.108417       |
| N3        | n         | 0.103744       | H2        | ha        | 0.125203       |
| C10       | cc        | 0.05075        | C2        | ca        | -0.446748      |
| C11       | cd        | -0.175702      | H1        | ha        | 0.198848       |
| N4        | nd        | -0.409251      |           |           |                |

**Table S 3: GAFF atom types and partial charges for BACE1 ligand 17a (see Figure S2a).**

| Atom Name | Atom Type | Partial Charge | Atom Name | Atom Type | Partial Charge |
|-----------|-----------|----------------|-----------|-----------|----------------|
| O1        | o         | -0.420996      | C8        | ca        | 0.035066       |
| C2        | c         | 0.431864       | C12       | ca        | -0.113999      |
| N1        | n         | -0.010074      | H15       | ha        | 0.045473       |
| C1        | c3        | -0.445537      | C9        | ca        | -0.153281      |
| H1        | h1        | 0.200946       | H14       | ha        | 0.168731       |
| H2        | h1        | 0.200946       | C10       | ca        | -0.183727      |
| H3        | h1        | 0.200946       | H13       | ha        | 0.180644       |
| C3        | cz        | 0.522994       | C11       | ca        | -0.086165      |
| N2        | nh        | -0.871394      | H12       | ha        | 0.162396       |
| H4        | hn        | 0.45887        | C13       | cp        | 0.000903       |
| H5        | hn        | 0.45887        | C14       | cp        | -0.004201      |
| N3        | nh        | -0.352492      | C19       | ca        | -0.037461      |
| H6        | hn        | 0.408688       | H18       | ha        | 0.124191       |
| C4        | c3        | 0.016373       | C15       | ca        | -0.037461      |
| C5        | cx        | -0.100077      | H16       | ha        | 0.124191       |
| C6        | cx        | -0.189835      | C16       | ca        | -0.108417      |
| C7        | cx        | -0.189835      | C11       | cl        | -0.066924      |
| H7        | hc        | 0.107251       | C17       | ca        | 0.081031       |
| H8        | hc        | 0.107251       | H17       | ha        | 0.129663       |
| H9        | hc        | 0.107251       | C18       | ca        | -0.108417      |
| H10       | hc        | 0.107251       | C12       | cl        | -0.066924      |
| H11       | hc        | 0.165423       |           |           |                |

**Table S 4: GAFF atom types and partial charges for BACE1 ligand 24 (see Figure S2b).**

| Atom Name | Atom Type | Partial Charge | Atom Name | Atom Type | Partial Charge |
|-----------|-----------|----------------|-----------|-----------|----------------|
| C21       | c3        | -0.326405      | C5        | ca        | 0.03703        |
| H18       | hc        | 0.13282        | C1        | c3        | -0.051868      |
| H19       | hc        | 0.13282        | C4        | cx        | -0.084258      |
| H20       | hc        | 0.13282        | C12       | cx        | -0.186601      |
| C20       | c1        | 0.157053       | C13       | cx        | -0.186601      |
| C19       | cg        | -0.430907      | H13       | hc        | 0.105009       |
| C16       | ca        | 0.096974       | H14       | hc        | 0.105009       |
| C17       | ca        | 0.285575       | H11       | hc        | 0.105009       |
| N4        | nb        | -0.603502      | H12       | hc        | 0.105009       |
| C18       | ca        | 0.341428       | H1        | hc        | 0.165481       |
| H17       | h4        | 0.072048       | N1        | nh        | -0.359905      |
| H16       | h4        | 0.108777       | H21       | hn        | 0.404658       |
| C15       | ca        | -0.005904      | C2        | cz        | 0.559392       |
| H15       | ha        | 0.15041        | N3        | nh        | -0.882896      |
| C14       | cp        | -0.222984      | H6        | hn        | 0.461914       |
| C7        | cp        | 0.035282       | H7        | hn        | 0.461914       |
| C8        | ca        | -0.095128      | N2        | n         | -0.034431      |
| C9        | ca        | -0.177191      | C11       | c3        | -0.438673      |
| C10       | ca        | -0.151483      | H8        | h1        | 0.198684       |
| H5        | ha        | 0.167775       | H9        | h1        | 0.198684       |
| H4        | ha        | 0.178333       | H10       | h1        | 0.198684       |
| H3        | ha        | 0.152977       | C3        | c         | 0.482504       |
| C6        | ca        | -0.126197      | O1        | o         | -0.431915      |
| H2        | ha        | 0.062777       |           |           |                |

**Table S 5: The number of  $\lambda$  values used for each simulation.**

|          | State   | Complex |     | Free |     |
|----------|---------|---------|-----|------|-----|
|          |         | In      | Out | In   | Out |
| Thrombin | AIM     | 11      | 11  | 11   | 11  |
|          | AcclAIM | 13      | 12  | 12   | 12  |
|          | AIM/MC  | 11      | 11  | 11   | 11  |
| BACE1    | AIM     | 11      | 11  | 11   | 11  |
|          | AcclAIM | 12      | 13  | 14   | 13  |
|          | AIM/MC  | 11      | 11  | 11   | 11  |

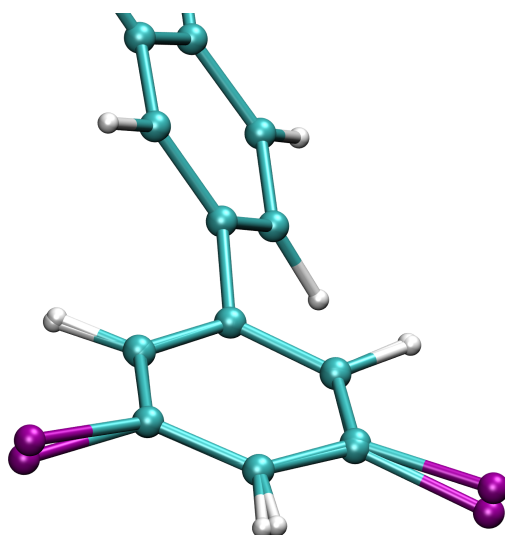

Figure S 3: Structure of the BACE1 ligand 17a before and after an attempted rotation. The Chlorine atoms (purple) have small differences in their location before and after the rotation, causing an unfavorable increase in the potential energy. These small differences in the coordinates are responsible for reducing the acceptance probability given by eq 3 in the manuscript. Tachyon<sup>1</sup> in visual molecular dynamics<sup>2</sup> was used for rendering.

## References

- (1) Stone, J. An Efficient Library for Parallel Ray Tracing and Animation. M.Sc. thesis, Computer Science Department, University of Missouri-Rolla, 1998.
- (2) Humphrey, W.; Dalke, A.; Schulten, K. VMD – Visual Molecular Dynamics. *J. Molec. Graphics* **1996**, *14*, 33–38.
